# Supplementary material for: Linking Periodontitis to Adverse Pregnancy Outcomes: a Comprehensive Review and Meta-analysis
Source: Springer Nature journal article supplement (doi:10.1007/s40496-024-00371-6), 2024-03-15
Supplement: MOESM1 [file 26865056]

| <b>rejected studies</b>                                                                                                                                                                                                                                                                                                                                                                      |                                 |
|----------------------------------------------------------------------------------------------------------------------------------------------------------------------------------------------------------------------------------------------------------------------------------------------------------------------------------------------------------------------------------------------|---------------------------------|
| <b>Reference</b>                                                                                                                                                                                                                                                                                                                                                                             | <b>Reason</b>                   |
| Pockpa ZAD, Soueidan A, Koffi-Coulibaly NT, Mobio GS, Pere M, Badran Z, Struillou X. Association Between Periodontitis and Preterm Birth in a Cohort of Pregnant Women in Ivory Coast. <i>Oral Health Prev Dent.</i> 2022 Oct 19;20(1):363-368. doi: 10.3290/j.ohpd.b3464893.                                                                                                                | Information not clear           |
| Alrumayh A, Alfuhaid F, Sayed AJ, Tareen SUK, Alrumayh I, Habibullah MA. Maternal Periodontal Disease: A Possible Risk Factor for Adverse Pregnancy Outcomes in the Qassim Region of Saudi Arabia. <i>J Pharm Bioallied Sci.</i> 2021 Nov;13(Suppl 2):S1723-S1727. doi: 10.4103/jpbs.JPBS_838_20.                                                                                            | Information not clear           |
| Rani Balaji VC, Saraswathi K, Manikandan S. Periodontal health in first trimester of pregnancy and birth weight outcomes. <i>Indian J Dent Res.</i> 2021 Apr-Jun;32(2):181-186. doi: 10.4103/ijdr.ijdr_94_21.                                                                                                                                                                                | Did not meet inclusion criteria |
| Gomes-Filho IS, Trindade SC, da Cruz SS, Figueiredo ACMG, Hintz AM, Adan LFF, Cerqueira EMM, Passos-Soares JS, Vianna MIP, Coelho JMF, Alves CMC, Barreto ML, Seymour GJ, Loomer PM, Scannapieco FA. Mothers' high glycemic levels and the association between periodontitis and low birth weight. <i>J Periodontol.</i> 2022 Jul;93(7):954-965. doi: 10.1002/JPER.21-0406. Epub 2022 Feb 7. | Not focused on periodontitis    |
| Foratori-Junior GA, Mosquim V, Buzalaf MAR, Sales-Peres SHC. Salivary cytokines levels, maternal periodontitis and infants' weight at birth: A cohort study in pregnant women with obesity. <i>Placenta.</i> 2021 Nov;115:151-157. doi: 10.1016/j.placenta.2021.09.018. Epub 2021 Sep 25.                                                                                                    | Not focused on periodontitis    |
| Mahendra J, Mahendra L, Mugri MH, Sayed ME, Bhandi S, Alshahrani RT, Balaji TM, Varadarajan S, Tanneeru S, P ANR, Srinivasan S, Reda R, Testarelli L, Patil S. Role of Periodontal Bacteria, Viruses, and Placental mir155 in Chronic Periodontitis and Preeclampsia-A Genetic Microbiological Study. <i>Curr Issues Mol Biol.</i> 2021 Jul 29;43(2):831-844. doi: 10.3390/cimb43020060.     | Not focused on periodontitis    |
| Dave BH, Shah EB, Gaikwad RV, Shah SS. Association of preterm low-birth-weight infants and maternal periodontitis during pregnancy: An interventional study. <i>J Indian Soc Pedod Prev Dent.</i> 2021 Apr-Jun;39(2):183-188. doi: 10.4103/jisppd.jisppd_270_20.                                                                                                                             | Did not meet inclusion criteria |
| Katarzyńska-Konwa M, Obersztyn I, Trzcionka A, Mocny-Pachońska K, Mosler B, Tanasiewicz M. Oral Status in Pregnant Women from Post-Industrial Areas of Upper Silesia in Reference to Occurrence of: Preterm Labors, Low Birth Weight and Type of Labor. <i>Healthcare (Basel).</i> 2020 Dec 1;8(4):528. doi: 10.3390/healthcare8040528.                                                      | Information not clear           |
| Mahapatra A, Nayak R, Satpathy A, Pati BK, Mohanty R, Mohanty G, Beura R. Maternal periodontal status, oral inflammatory load, and systemic inflammation are associated with low infant birth weight. <i>J Periodontol.</i> 2021 Aug;92(8):1107-1116. doi: 10.1002/JPER.20-0266.                                                                                                             | Information not clear           |
| Thakur RK, Yadav BK, Sultana R, Afridi SK, Das D, Sahoo SK. Influence of Periodontal Infection as a Possible Risk Factor for Preterm Low Birth Weight. <i>J Pharm Bioallied Sci.</i> 2020 Aug;12(Suppl 1):S613-S618. doi: 10.4103/jpbs.JPBS_73_20.                                                                                                                                           | Not focused on periodontitis    |
| Ye C, Xia Z, Tang J, Khemwong T, Kapila Y, Kuraji R, Huang P, Wu Y, Kobayashi H. Unculturable and culturable periodontal-related bacteria are associated with periodontal inflammation during pregnancy and with preterm low birth weight delivery. <i>Sci Rep.</i> 2020 Sep 25;10(1):15807. doi: 10.1038/s41598-020-72807-9.                                                                | Not focused on periodontitis    |
| Ye C, Katagiri S, Miyasaka N, Kobayashi H, Khemwong T, Nagasawa T, Izumi Y. The periodontopathic bacteria in placenta, saliva and subgingival plaque of threatened preterm labor and preterm low birth weight cases: a longitudinal study in Japanese pregnant women. <i>Clin Oral Investig.</i> 2020 Dec;24(12):4261-4270. doi: 10.1007/s00784-020-03287-4                                  | Not focused on periodontitis    |

|                                                                                                                                                                                                                                                                                                                                                                 |                                 |
|-----------------------------------------------------------------------------------------------------------------------------------------------------------------------------------------------------------------------------------------------------------------------------------------------------------------------------------------------------------------|---------------------------------|
| Caneiro L, Lopez-Carral JM, Martin-Lancharro P, Linares A, Batalla P, Blanco-Carrion J. Periodontitis as a Preterm Birth Risk Factor in Caucasian Women: A Cohort Study. <i>Oral Health Prev Dent</i> . 2020;18(1):77-84. doi: 10.3290/j.ohpd.a44116.                                                                                                           | Information not clear           |
| Taniguchi-Tabata A, Takeuchi N, Uchida Y, Ekuni D, Morita M. Association between maternal periodontal status and ultrasonographic measurement of fetal growth: A longitudinal study. <i>Sci Rep</i> . 2020 Jan 29;10(1):1402. doi: 10.1038/s41598-020-58396-7.                                                                                                  | Did not meet inclusion criteria |
| Calixto NR, Alves CM, Abreu LM, Thomaz EB, Vidal FC, Filho IS, Lopes FF. Detection of periodontal pathogens in mothers of preterm birth and/or low weight. <i>Med Oral Patol Oral Cir Bucal</i> . 2019 Nov 1;24(6):e776-e781. doi: 10.4317/medoral.23135.                                                                                                       | Not focused on periodontitis    |
| Kopycka-Kedzierawski DT, Li D, Xiao J, Billings RJ, Dye TD. Association of periodontal disease with depression and adverse birth outcomes: Results from the Perinatal database; Finger Lakes region, New York State. <i>PLoS One</i> . 2019 Apr 18;14(4):e0215440. doi: 10.1371/journal.pone.0215440.                                                           | Information not clear           |
| Krüger MSDM, Casarin RP, Pinto GDS, Pappen FG, Camargo MJB, Correa FOB, Romano AR. Maternal periodontal disease and adverse perinatal outcomes: is there an association? A hospital-based case-control study. <i>J Matern Fetal Neonatal Med</i> . 2019 Oct;32(20):3401-3407. doi: 10.1080/14767058.2018.1464554.                                               | Did not meet inclusion criteria |
| Rakoto-Alson S, Tenenbaum H, Davideau JL. Periodontal diseases, preterm births, and low birth weight: findings from a homogeneous cohort of women in Madagascar. <i>J Periodontol</i> . 2010 Feb;81(2):205-13. doi: 10.1902/jop.2009.090351. PMID: 20151798.                                                                                                    | Not focused on periodontitis    |
| Reza Karimi M, Hamissi JH, Naeini SR, Karimi M. The Relationship Between Maternal Periodontal Status of and Preterm and Low Birth Weight Infants in Iran: A Case Control Study. <i>Glob J Health Sci</i> . 2015 Sep 28;8(5):184-8. doi: 10.5539/gjhs.v8n5p184. PMID: 26652090; PMCID: PMC4877198.                                                               | Information not clear           |
| Ryu JI, Oh K, Yang H, Choi BK, Ha JE, Jin BH, Kim HD, Bae KH. Health behaviors, periodontal conditions, and periodontal pathogens in spontaneous preterm birth: a case-control study in Korea. <i>J Periodontol</i> . 2010 Jun;81(6):855-63. doi: 10.1902/jop.2010.090667. PMID: 20192615.                                                                      | Did not meet inclusion criteria |
| Taghzouti N, Xiong X, Gornitsky M, Chandad F, Voyer R, Gagnon G, Leduc L, Xu H, Tulandi T, Wei B, Sénécal J, Velly AM, Salah MH, Fraser WD. Periodontal disease is not associated with preeclampsia in Canadian pregnant women. <i>J Periodontol</i> . 2012 Jul;83(7):871-7. doi: 10.1902/jop.2011.110342. Epub 2011 Dec 22. PMID: 22191787; PMCID: PMC4469482. | Did not meet inclusion criteria |
| Takeuchi N, Ekuni D, Irie K, Furuta M, Tomofuji T, Morita M, Watanabe T. Relationship between periodontal inflammation and fetal growth in pregnant women: a cross-sectional study. <i>Arch Gynecol Obstet</i> . 2013 May;287(5):951-7. doi: 10.1007/s00404-012-2660-4. Epub 2012 Dec 7. PMID: 23224698.                                                        | Not focused on periodontitis    |
| Tarannum F, Faizuddin M. Effect of periodontal therapy on pregnancy outcome in women affected by periodontitis. <i>J Periodontol</i> . 2007 Nov;78(11):2095-103. doi: 10.1902/jop.2007.060388. PMID: 17970675.                                                                                                                                                  | Did not meet inclusion criteria |
| Tucker R. Periodontitis and pregnancy. <i>J R Soc Promot Health</i> . 2006 Jan;126(1):24-7. doi: 10.1177/1466424006061170. PMID: 16478012.                                                                                                                                                                                                                      | Information not clear           |
| Turton M, Africa CWJ. Further evidence for periodontal disease as a risk indicator for adverse pregnancy outcomes. <i>Int Dent J</i> . 2017 Jun;67(3):148-156. English. doi: 10.1111/idj.12274. Epub 2016 Dec 17. PMID: 27988930; PMCID: PMC9376689.                                                                                                            | Information not clear           |
| Urbán E, Radnai M, Novák T, Gorzó I, Pál A, Nagy E. Distribution of anaerobic bacteria among pregnant periodontitis patients who experience preterm delivery. <i>Anaerobe</i> . 2006 Feb;12(1):52-7. doi: 10.1016/j.anaerobe.2005.08.001. Epub 2005 Sep 30. PMID: 16701612.                                                                                     | Did not meet inclusion criteria |

|                                                                                                                                                                                                                                                                                                                                                                                                |                                 |
|------------------------------------------------------------------------------------------------------------------------------------------------------------------------------------------------------------------------------------------------------------------------------------------------------------------------------------------------------------------------------------------------|---------------------------------|
| Vettore MV, Lamarca Gde A, Leão AT, Thomaz FB, Sheiham A, Leal Mdo C. Periodontal infection and adverse pregnancy outcomes: a systematic review of epidemiological studies. <i>Cad Saude Publica</i> . 2006 Oct;22(10):2041-53. doi: 10.1590/s0102-311x2006001000010. PMID: 16951876.                                                                                                          | Did not meet inclusion criteria |
| Vettore MV, Leal Md, Leão AT, da Silva AM, Lamarca GA, Sheiham A. The relationship between periodontitis and preterm low birthweight. <i>J Dent Res</i> . 2008 Jan;87(1):73-8. doi: 10.1177/154405910808700113. PMID: 18096898.                                                                                                                                                                | Information not clear           |
| Vogt M, Sallum AW, Cecatti JG, Morais SS. Periodontal disease and some adverse perinatal outcomes in a cohort of low risk pregnant women. <i>Reprod Health</i> . 2010 Nov 3;7:29. doi: 10.1186/1742-4755-7-29. PMID: 21047427; PMCID: PMC2987758.                                                                                                                                              | Information not clear           |
| Wang YL, Liou JD, Pan WL. Association between maternal periodontal disease and preterm delivery and low birth weight. <i>Taiwan J Obstet Gynecol</i> . 2013 Mar;52(1):71-6. doi: 10.1016/j.tjog.2013.01.011. PMID: 23548222.                                                                                                                                                                   | Information not clear           |
| David A Albert 1, Melissa D Begg, Howard F Andrews, Sharifa Z Williams, Angela Ward, Mary Lee Conicella, Virginia Rauh, Janet L Thomson, Panos N Papapanou PMID: 21088265 PMCID: PMC3000729 DOI: 10.2105/AJPH.2009.185884                                                                                                                                                                      | Not focused on periodontitis    |
| Bobetsis YA, Barros SP, Offenbacher S. Exploring the relationship between periodontal disease and pregnancy complications. <i>J Am Dent Assoc</i> . 2006 Oct;137 Suppl:7S-13S. doi: 10.14219/jada.archive.2006.0403. Erratum in: <i>J Am Dent Assoc</i> . 2008 Mar;139(3):252. PMID: 17012730.                                                                                                 | Did not meet inclusion criteria |
| Xiong X, Buekens P, Fraser WD, Beck J, Offenbacher S. Periodontal disease and adverse pregnancy outcomes: a systematic review. <i>BJOG</i> . 2006 Feb;113(2):135-43. doi: 10.1111/j.1471-0528.2005.00827.x. PMID: 16411989.                                                                                                                                                                    | Did not meet inclusion criteria |
| Boggess KA, Beck JD, Murtha AP, Moss K, Offenbacher S. Maternal periodontal disease in early pregnancy and risk for a small-for-gestational-age infant. <i>Am J Obstet Gynecol</i> . 2006 May;194(5):1316-22. doi: 10.1016/j.ajog.2005.11.059. Epub 2006 Apr 21. PMID: 16647916.                                                                                                               | Did not meet inclusion criteria |
| Boggess KA. Choosing the left fork: Steven Offenbacher and understanding maternal periodontal disease and adverse pregnancy outcomes. <i>J Periodontol</i> . 2020 Oct;91 Suppl 1:S40-S44. doi: 10.1002/JPER.20-0090. Epub 2020 Aug 18. PMID: 32614074.                                                                                                                                         | Review                          |
| Ferguson JE 2nd, Hansen WF, Novak KF, Novak MJ. Should we treat periodontal disease during gestation to improve pregnancy outcomes? <i>Clin Obstet Gynecol</i> . 2007 Jun;50(2):454-67. doi: 10.1097/GRF.0b013e31804c9f05. PMID: 17513931.                                                                                                                                                     | Did not meet inclusion criteria |
| Fogacci MF, Leão A, Vettore MV, Sheiham A, Radnai M, Pál A, Novák T, Urbán E, Eller J, Gorzó I. Periodontal treatment completed before the 35th week of pregnancy appeared to have a beneficial effect on birthweight and time of delivery. Letter to the editor. <i>J Dent Res</i> . 2010 Feb;89(2):101; author reply 101-2. doi: 10.1177/0022034509356518. Epub 2009 Dec 29. PMID: 20040741. | Not focused on periodontitis    |
| Gera I. A várandós nő parodontális egészségi állapota és a terhességi komplikációk közötti kapcsolat [The association between maternal periodontal health and adverse pregnancy outcomes]. <i>Orv Hetil</i> . 2018 Jun;159(25):999-1007. Hungarian. doi: 10.1556/650.2018.31120. PMID: 29909659.                                                                                               | Information not clear           |
| Gomes-Filho IS, Pereira EC, Cruz SS, Adan LF, Vianna MI, Passos-Soares JS, Trindade SC, Oliveira EP, Oliveira MT, Cerqueira Ede M, Pereira AL, Barreto ML, Seymour GJ. Relationship Among Mothers' Glycemic Level, Periodontitis, and Birth Weight. <i>J Periodontol</i> . 2016 Mar;87(3):238-47. doi: 10.1902/jop.2015.150423. Epub 2015 Oct 29. PMID: 26513266.                              | Not focused on periodontitis    |
| Ide M, Papapanou PN. Epidemiology of association between maternal periodontal disease and adverse pregnancy outcomes--systematic review. <i>J Periodontol</i> . 2013 Apr;84(4 Suppl):S181-94. doi: 10.1902/jop.2013.134009. PMID: 23631578.                                                                                                                                                    | Review                          |

|                                                                                                                                                                                                                                                                                                                                                                 |                                 |
|-----------------------------------------------------------------------------------------------------------------------------------------------------------------------------------------------------------------------------------------------------------------------------------------------------------------------------------------------------------------|---------------------------------|
| Guo H, Ren H, Liang S, Ji Y, Jiang H, Zhang P, Du M. Phosphatidylinositol 3-Kinase/Akt signal pathway resists the apoptosis and inflammation in human extravillous trophoblasts induced by Porphyromonas gingivalis. Mol Immunol. 2018 Dec;104:100-107. doi: 10.1016/j.molimm.2018.10.008. PMID: 30448607.                                                      | Did not meet inclusion criteria |
| Kushtagi P, Kaur G, Kukkamalla MA, Thomas B. Periodontal infection in women with low birth weight neonates. Int J Gynaecol Obstet. 2008 Jun;101(3):296-8. doi: 10.1016/j.ijgo.2008.01.010. Epub 2008 Mar 7. PMID: 18316087.                                                                                                                                     | Information not clear           |
| Leader D. Periodontal disease treatment does not affect pregnancy outcomes. J Am Dent Assoc. 2014 Jul;145(7):757-9. doi: 10.14219/jada.2014.26. PMID: 24982283.                                                                                                                                                                                                 | Information not clear           |
| Jiang H, Su Y, Xiong X, Harville E, Wu H, Jiang Z, Qian X. Prevalence and risk factors of periodontal disease among pre-conception Chinese women. Reprod Health. 2016 Dec 1;13(1):141. doi: 10.1186/s12978-016-0256-3. PMID: 27903295; PMCID: PMC5131524.                                                                                                       | Did not meet inclusion criteria |
| Le Borgne H, Soueidan A, Caroit-Cambazard Y, Boutigny H, Jean-Baptiste K, Nguyen JM, Philippe HJ. Maladies parodontales et accouchements prématurés: étude clinique pilote [Periodontal diseases and preterm birth: a pilot study]. Gynecol Obstet Fertil. 2011 Jun;39(6):399-401. French. doi: 10.1016/j.gyobfe.2011.04.019. Epub 2011 May 23. PMID: 21602087. | Did not meet inclusion criteria |
| López NJ, Smith PC, Gutierrez J. Higher risk of preterm birth and low birth weight in women with periodontal disease. J Dent Res. 2002 Jan;81(1):58-63. doi: 10.1177/002203450208100113. PMID: 11820369.                                                                                                                                                        | Did not meet inclusion criteria |
| Kawar N, Alrayyes S. Periodontitis in pregnancy: the risk of preterm labor and low birth weight. Dis Mon. 2011 Apr;57(4):192-202. doi: 10.1016/j.disamonth.2011.03.005. PMID: 21569882.                                                                                                                                                                         | Review                          |
| Kumar A, Basra M, Begum N, Rani V, Prasad S, Lamba AK, Verma M, Agarwal S, Sharma S. Association of maternal periodontal health with adverse pregnancy outcome. J Obstet Gynaecol Res. 2013 Jan;39(1):40-5. doi: 10.1111/j.1447-0756.2012.01957.x. Epub 2012 Jul 29. PMID: 22845916.                                                                            | Not focused on periodontitis    |
| López R. Treatment of periodontal infection does not reduce the rates of poor pregnancy outcomes. Int J Evid Based Healthc. 2011 Dec;9(4):450; author reply 451. doi: 10.1111/j.1744-1609.2011.00238.x. PMID: 22093395.                                                                                                                                         | Information not clear           |
| Madianos PN, Bobetsis YA, Offenbacher S. Adverse pregnancy outcomes (APOs) and periodontal disease: pathogenic mechanisms. J Periodontol. 2013 Apr;84(4 Suppl):S170-80. doi: 10.1902/jop.2013.1340015. PMID: 23631577.                                                                                                                                          | Information not clear           |
| Marakoglu I, Gursoy UK, Marakoglu K, Cakmak H, Ataoglu T. Periodontitis as a risk factor for preterm low birth weight. Yonsei Med J. 2008 Apr 30;49(2):200-3. doi: 10.3349/ymj.2008.49.2.200. PMID: 18452254; PMCID: PMC2615330.                                                                                                                                | Information not clear           |
| Molitero LF, Monteiro B, Figueredo CM, Fischer RG. Association between periodontitis and low birth weight: a case-control study. J Clin Periodontol. 2005 Aug;32(8):886-90. doi: 10.1111/j.1600-051X.2005.00781.x. PMID: 15998273.                                                                                                                              | Information not clear           |
| Mealey BL, Rose LF. Diabetes mellitus and inflammatory periodontal diseases. Compend Contin Educ Dent. 2008 Sep;29(7):402-8, 410, 412-3. PMID: 18795634.                                                                                                                                                                                                        | Not focused on periodontitis    |
| Merchant AT, Liu J, Reynolds MA, Beck JD, Zhang J. Quantile regression to estimate the survivor average causal effect of periodontal treatment effects on birthweight and gestational age. J Periodontol. 2021 Jul;92(7):975-982. doi: 10.1002/JPER.20-0376. Epub 2020 Nov 5. PMID: 33155296.                                                                   | Not focused on periodontitis    |
| Moreu G, Téllez L, González-Jaranay M. Relationship between maternal periodontal disease and low-birth-weight pre-term infants. J Clin Periodontol. 2005 Jun;32(6):622-7. doi: 10.1111/j.1600-051X.2005.00722.x. PMID: 15882221.                                                                                                                                | Information not clear           |

|                                                                                                                                                                                                                                                                                                                                                 |                                 |
|-------------------------------------------------------------------------------------------------------------------------------------------------------------------------------------------------------------------------------------------------------------------------------------------------------------------------------------------------|---------------------------------|
| Muwazi L, Rwenyonyi CM, Nkamba M, Kutesa A, Kagawa M, Mugenyi G, Kwizera G, Okullo I. Periodontal conditions, low birth weight and preterm birth among postpartum mothers in two tertiary health facilities in Uganda. BMC Oral Health. 2014 Apr 28;14:42. doi: 10.1186/1472-6831-14-42. PMID: 24773772; PMCID: PMC4022576.                     | Information not clear           |
| Puertas A, Magan-Fernandez A, Blanc V, Revelles L, O'Valle F, Pozo E, León R, Mesa F. Association of periodontitis with preterm birth and low birth weight: a comprehensive review. J Matern Fetal Neonatal Med. 2018 Mar;31(5):597-602. doi: 10.1080/14767058.2017.1293023. Epub 2017 Feb 28. PMID: 28282773.                                  | Review                          |
| Radnai M, Gorzó I, Nagy E, Urbán E, Novák T, Pál A. A possible association between preterm birth and early periodontitis. A pilot study. J Clin Periodontol. 2004 Sep;31(9):736-41. doi: 10.1111/j.1600-051X.2004.00564.x. PMID: 15312095.                                                                                                      | Did not meet inclusion criteria |
| Radnai M, Gorzó I, Urbán E, Eller J, Novák T, Pál A. Possible association between mother's periodontal status and preterm delivery. J Clin Periodontol. 2006 Nov;33(11):791-6. doi: 10.1111/j.1600-051X.2006.00986.x. Epub 2006 Sep 13. PMID: 16970625.                                                                                         | Information not clear           |
| Corbella S, Taschieri S, Francetti L, De Siena F, Del Fabbro M. Periodontal disease as a risk factor for adverse pregnancy outcomes: a systematic review and meta-analysis of case-control studies. Odontology. 2012 Jul;100(2):232-40. doi: 10.1007/s10266-011-0036-z. Epub 2011 Jul 8. PMID: 21739194.                                        | Did not meet inclusion criteria |
| Buduneli N, Baylas H, Buduneli E, Türkoğlu O, Köse T, Dahlen G. Periodontal infections and pre-term low birth weight: a case-control study. J Clin Periodontol. 2005 Feb;32(2):174-81. doi: 10.1111/j.1600-051X.2005.00670.x. PMID: 15691348.                                                                                                   | Not focused on periodontitis    |
| Caneiro L, Lopez-Carral JM, Martin-Lancharro P, Linares A, Batalla P, Blanco-Carrion J. Periodontitis as a Preterm Birth Risk Factor in Caucasian Women: A Cohort Study. Oral Health Prev Dent. 2020;18(1):77-84. doi: 10.3290/j.ohpd.a44116. PMID: 32051974.                                                                                   | Information not clear           |
| Clothier B, Stringer M, Jeffcoat MK. Periodontal disease and pregnancy outcomes: exposure, risk and intervention. Best Pract Res Clin Obstet Gynaecol. 2007 Jun;21(3):451-66. doi: 10.1016/j.bpobgyn.2007.01.005. Epub 2007 Mar 23. PMID: 17363331.                                                                                             | Review                          |
| Dasanayake AP, Gennaro S, Hendricks-Muñoz KD, Chhun N. Maternal periodontal disease, pregnancy, and neonatal outcomes. MCN Am J Matern Child Nurs. 2008 Jan-Feb;33(1):45-9. doi: 10.1097/01.NMC.0000305657.24613.47. PMID: 18158527.                                                                                                            | Review                          |
| Ercan E, Eratalay K, Deren O, Gur D, Ozyuncu O, Altun B, Kanli C, Ozdemir P, Akincibay H. Evaluation of periodontal pathogens in amniotic fluid and the role of periodontal disease in pre-term birth and low birth weight. Acta Odontol Scand. 2013 May-Jul;71(3-4):553-9. doi: 10.3109/00016357.2012.697576. Epub 2012 Jul 2. PMID: 23638858. | Not focused on periodontitis    |
