# Supplementary material for: Linking Periodontitis to Adverse Pregnancy Outcomes: a Comprehensive Review and Meta-analysis
Source: Springer Nature journal article supplement (doi:10.1007/s40496-024-00371-6), 2024-03-15
Supplement: MOESM2 [file 26865056]

| Newcastle-Ottawa (NOS) RoB                                                                                                          |                                      |                                 |                       |                                 |                          |                      |                       |                                  |                 |
|-------------------------------------------------------------------------------------------------------------------------------------|--------------------------------------|---------------------------------|-----------------------|---------------------------------|--------------------------|----------------------|-----------------------|----------------------------------|-----------------|
| Study                                                                                                                               | Selection                            |                                 |                       |                                 | Comparability            | Outcome              |                       |                                  | Overall quality |
|                                                                                                                                     | Representativeness of exposed cohort | Selection of non-exposed cohort | Ascertain of exposure | Outcome not present start study | Comparability of cohorts | Ascertain of outcome | Follow-up time enough | Adequacy of follow-up of cohorts |                 |
| Moore et al. 2004 United Kingdom                                                                                                    | 1                                    | 1                               | 1                     | 1                               | 1                        | 1                    | 1                     | 1                                | Good            |
| Offenbacher et al. 2006 USA                                                                                                         | 1                                    | 1                               | 1                     | 1                               | 1                        | 1                    | 1                     | 1                                | Good            |
| Saddki et al. 2008 Malaysia                                                                                                         | 1                                    | 1                               | 1                     | 1                               | 1                        | 1                    | 1                     | 1                                | Good            |
| Agueda et al. 2008 Spain                                                                                                            | 1                                    | 1                               | 1                     | 1                               | 1                        | 1                    | 1                     | 1                                | Good            |
| Santacruz et al. 2010 Spain                                                                                                         | 1                                    | 1                               | 1                     | 1                               | 1                        | 1                    | 1                     | 1                                | Good            |
| Wolff et al. 2010 Argentina                                                                                                         | 1                                    | 1                               | 1                     | 1                               | 1                        | 1                    | 1                     | 1                                | Good            |
| Ali et al. 2012 Malaysia                                                                                                            | 1                                    | 1                               | 1                     | 1                               | 1                        | 1                    | 1                     | 1                                | Good            |
| Gallagher-Cobos et al. 2022 Spain                                                                                                   | 1                                    | 1                               | 1                     | 1                               | 1                        | 1                    | 1                     | 1                                | Good            |
| Good quality: 3 or 4 stars in Selection domain AND 1 or 2 stars in Comparability domain AND 2 or 3 stars in outcome/exposure domain |                                      |                                 |                       |                                 |                          |                      |                       |                                  |                 |
| Fair quality: 2 stars in Selection domain AND 1 or 2 stars in Comparability domain AND 2 or 3 stars in outcome/exposure domain      |                                      |                                 |                       |                                 |                          |                      |                       |                                  |                 |
| Poor quality: 0 or 1 stars in Selection domain AND 0 stars in Comparability domain AND 0 or 1 stars in outcome/exposure domain      |                                      |                                 |                       |                                 |                          |                      |                       |                                  |                 |

| Newcastle-Ottawa (NOS) RoB                                                                                                          |                          |                             |                       |                        |                                     |                       |                                |                   |                 |
|-------------------------------------------------------------------------------------------------------------------------------------|--------------------------|-----------------------------|-----------------------|------------------------|-------------------------------------|-----------------------|--------------------------------|-------------------|-----------------|
| Study                                                                                                                               | Selection                |                             |                       |                        | Comparability                       | Exposure              |                                |                   | Overall quality |
|                                                                                                                                     | Case definition adequate | Representativeness of cases | Selection of controls | Definition of controls | Comparability of cases and controls | Ascertain of exposure | Same method ascertain exposure | Non-response rate |                 |
| Davenport et al. 2002 England                                                                                                       | 1                        | 1                           | 1                     | 1                      | 1                                   | 1                     | 1                              | 0                 | Good            |
| Cruz et al. 2005 Brazil                                                                                                             | 1                        | 1                           | 1                     | 1                      | 1                                   | 1                     | 1                              | 0                 | Good            |
| Bassani et al. 2007 Brazil                                                                                                          | 1                        | 1                           | 1                     | 1                      | 1                                   | 1                     | 1                              | 0                 | Good            |
| Siqueira et al. 2007 Brazil                                                                                                         | 1                        | 1                           | 1                     | 1                      | 1                                   | 1                     | 1                              | 1                 | Good            |
| Nabet et al. 2010 France                                                                                                            | 1                        | 1                           | 1                     | 1                      | 2                                   | 1                     | 1                              | 1                 | Good            |
| Baskaradoss et al. 2011 India                                                                                                       | 1                        | 1                           | 1                     | 1                      | 1                                   | 1                     | 1                              | 1                 | Good            |
| Martinez de Tejada et al. 2012 Switzerland                                                                                          | 1                        | 1                           | 1                     | 1                      | 1                                   | 1                     | 1                              | 1                 | Good            |
| Jacob et al. 2014 India                                                                                                             | 1                        | 1                           | 1                     | 1                      | 1                                   | 1                     | 1                              | 0                 | Good            |
| Noack et al. 2015 Germany                                                                                                           | 1                        | 0                           | 1                     | 1                      | 0                                   | 1                     | 1                              | 0                 | Fair            |
| Souza et al. 2015 Brazil                                                                                                            | 1                        | 1                           | 1                     | 1                      | 1                                   | 1                     | 1                              | 1                 | Good            |
| Wazir et al. 2019 India                                                                                                             | 1                        | 0                           | 1                     | 1                      | 1                                   | 1                     | 1                              | 0                 | Good            |
| Lafaurie et al. 2020 Colombia                                                                                                       | 1                        | 1                           | 1                     | 1                      | 1                                   | 1                     | 1                              | 0                 | Good            |
| Peña-Sisto et al. 2022 Cuba                                                                                                         | 1                        | 1                           | 1                     | 1                      | 1                                   | 1                     | 1                              | 0                 | Good            |
| Hussain et al. 2023 Pakistan                                                                                                        | 1                        | 1                           | 1                     | 1                      | 1                                   | 1                     | 1                              | 0                 | Good            |
| Bhavsar et al. 2023                                                                                                                 | 1                        | 1                           | 1                     | 1                      | 1                                   | 1                     | 1                              | 0                 | Good            |
| Good quality: 3 or 4 stars in Selection domain AND 1 or 2 stars in Comparability domain AND 2 or 3 stars in outcome/exposure domain |                          |                             |                       |                        |                                     |                       |                                |                   |                 |
| Fair quality: 2 stars in Selection domain AND 1 or 2 stars in Comparability domain AND 2 or 3 stars in outcome/exposure domain      |                          |                             |                       |                        |                                     |                       |                                |                   |                 |
| Poor quality: 0 or 1 stars in Selection domain AND 0 stars in Comparability domain AND 0 or 1 stars in outcome/exposure domain      |                          |                             |                       |                        |                                     |                       |                                |                   |                 |

| Study                               | 1. Was the research question or objective in this paper clearly stated? | 2. Was the study population clearly specified and defined? | 3. Was the participation rate of eligible persons at least 50%? | 4. Were all the subjects selected or recruited from the same or similar populations (including the same time period)? Were inclusion and exclusion criteria for being in the study prespecified and applied uniformly to all participants? | 5. Was a sample size justification, power description, or variance and effect estimates provided? | 6. For the analyses in this paper, were the exposure(s) of interest measured prior to the outcome(s) being measured? | 7. Was the timeframe sufficient so that one could reasonably expect to see an association between exposure and outcome if it existed? | 8. For exposures that can vary in amount or level, did the study examine different levels of the exposure as related to the outcome (e.g., categories of exposure, or exposure measured as continuous variable)? | 9. Were the exposure measures (independent variables) clearly defined, valid, reliable, and implemented consistently across all study participants? | 10. Was the exposure(s) assessed more than once over time? | 11. Were the outcome measures (dependent variables) clearly defined, valid, reliable, and implemented consistently across all study participants? | 12. Were the outcome assessors blinded to the exposure status of participants? | 13. Was loss to follow-up after baseline 20% or less? | 14. Were key potential confounding variables measured and adjusted statistically for their impact on the relationship between exposure(s) and outcome(s)? | Quality rating |
|-------------------------------------|-------------------------------------------------------------------------|------------------------------------------------------------|-----------------------------------------------------------------|--------------------------------------------------------------------------------------------------------------------------------------------------------------------------------------------------------------------------------------------|---------------------------------------------------------------------------------------------------|----------------------------------------------------------------------------------------------------------------------|---------------------------------------------------------------------------------------------------------------------------------------|------------------------------------------------------------------------------------------------------------------------------------------------------------------------------------------------------------------|-----------------------------------------------------------------------------------------------------------------------------------------------------|------------------------------------------------------------|---------------------------------------------------------------------------------------------------------------------------------------------------|--------------------------------------------------------------------------------|-------------------------------------------------------|-----------------------------------------------------------------------------------------------------------------------------------------------------------|----------------|
| Lumadelli et al. 2005 Brazil        | Yes                                                                     | No                                                         | Cannot determine                                                | Yes                                                                                                                                                                                                                                        | Yes                                                                                               | No                                                                                                                   | Yes                                                                                                                                   | Yes                                                                                                                                                                                                              | Not applicable                                                                                                                                      | Yes                                                        | No                                                                                                                                                | Not applicable                                                                 | Yes                                                   | Fair                                                                                                                                                      |                |
| Jarjoura et al. 2005 USA            | Yes                                                                     | No                                                         | Cannot determine                                                | No                                                                                                                                                                                                                                         | No                                                                                                | No                                                                                                                   | Yes                                                                                                                                   | Yes                                                                                                                                                                                                              | Not applicable                                                                                                                                      | Yes                                                        | No                                                                                                                                                | Not applicable                                                                 | Yes                                                   | Fair                                                                                                                                                      |                |
| Arteaga-Guerra et al. 2010 Colombia | Yes                                                                     | No                                                         | Cannot determine                                                | Yes                                                                                                                                                                                                                                        | No                                                                                                | No                                                                                                                   | Yes                                                                                                                                   | No                                                                                                                                                                                                               | Not applicable                                                                                                                                      | Yes                                                        | No                                                                                                                                                | Not applicable                                                                 | No                                                    | Poor                                                                                                                                                      |                |
| Schenkein et al. 2012 USA           | Yes                                                                     | Yes                                                        | Cannot determine                                                | Yes                                                                                                                                                                                                                                        | No                                                                                                | No                                                                                                                   | Yes                                                                                                                                   | No                                                                                                                                                                                                               | Not applicable                                                                                                                                      | Yes                                                        | No                                                                                                                                                | Not applicable                                                                 | No                                                    | Fair                                                                                                                                                      |                |
| Alves et al. 2016 Brazil            | Yes                                                                     | No                                                         | Cannot determine                                                | No                                                                                                                                                                                                                                         | No                                                                                                | No                                                                                                                   | Yes                                                                                                                                   | Yes                                                                                                                                                                                                              | Not applicable                                                                                                                                      | Yes                                                        | No                                                                                                                                                | Not applicable                                                                 | No                                                    | Poor                                                                                                                                                      |                |
| Mesq et al. 2017 Republic of Kosovo | Yes                                                                     | No                                                         | Cannot determine                                                | No                                                                                                                                                                                                                                         | No                                                                                                | No                                                                                                                   | No                                                                                                                                    | Yes                                                                                                                                                                                                              | Not applicable                                                                                                                                      | Yes                                                        | No                                                                                                                                                | Not applicable                                                                 | No                                                    | Poor                                                                                                                                                      |                |
| Micu et al. 2020 Romania            | Yes                                                                     | Yes                                                        | Cannot determine                                                | Yes                                                                                                                                                                                                                                        | Yes                                                                                               | No                                                                                                                   | Yes                                                                                                                                   | Yes                                                                                                                                                                                                              | Not applicable                                                                                                                                      | Yes                                                        | Yes                                                                                                                                               | Not applicable                                                                 | Yes                                                   | Fair                                                                                                                                                      |                |
| Pozo et al. 2020 Spain              | Yes                                                                     | Yes                                                        | Cannot determine                                                | Yes                                                                                                                                                                                                                                        | No                                                                                                | No                                                                                                                   | Yes                                                                                                                                   | No                                                                                                                                                                                                               | Not applicable                                                                                                                                      | Yes                                                        | No                                                                                                                                                | Not applicable                                                                 | No                                                    | Fair                                                                                                                                                      |                |
| Choi et al. 2021 USA                | Yes                                                                     | Yes                                                        | Cannot determine                                                | Yes                                                                                                                                                                                                                                        | No                                                                                                | No                                                                                                                   | Yes                                                                                                                                   | No                                                                                                                                                                                                               | Not applicable                                                                                                                                      | Yes                                                        | Not applicable                                                                                                                                    | Not applicable                                                                 | Yes                                                   | Fair                                                                                                                                                      |                |
| Ferrillo et al. 2021 Italy          | Yes                                                                     | Yes                                                        | Cannot determine                                                | Yes                                                                                                                                                                                                                                        | No                                                                                                | No                                                                                                                   | Yes                                                                                                                                   | Yes                                                                                                                                                                                                              | Not applicable                                                                                                                                      | Yes                                                        | Not applicable                                                                                                                                    | Not applicable                                                                 | No                                                    | Fair                                                                                                                                                      |                |
| Jyotirmay et al. 2021 India         | Yes                                                                     | Yes                                                        | Cannot determine                                                | Yes                                                                                                                                                                                                                                        | No                                                                                                | No                                                                                                                   | Yes                                                                                                                                   | No                                                                                                                                                                                                               | Not applicable                                                                                                                                      | Yes                                                        | No                                                                                                                                                | Not applicable                                                                 | No                                                    | Poor                                                                                                                                                      |                |
| Lee et al. 2022 Taiwan              | No                                                                      | Yes                                                        | Cannot determine                                                | Yes                                                                                                                                                                                                                                        | No                                                                                                | No                                                                                                                   | Yes                                                                                                                                   | No                                                                                                                                                                                                               | Not applicable                                                                                                                                      | Yes                                                        | Not applicable                                                                                                                                    | Not applicable                                                                 | No                                                    | Fair                                                                                                                                                      |                |
